# Supplementary material
Source: MDPI journal article supplement (https://www.mdpi.com/2227-9717/7/5/303)
Supplement: s1 [file s1]

**Supplementary file**

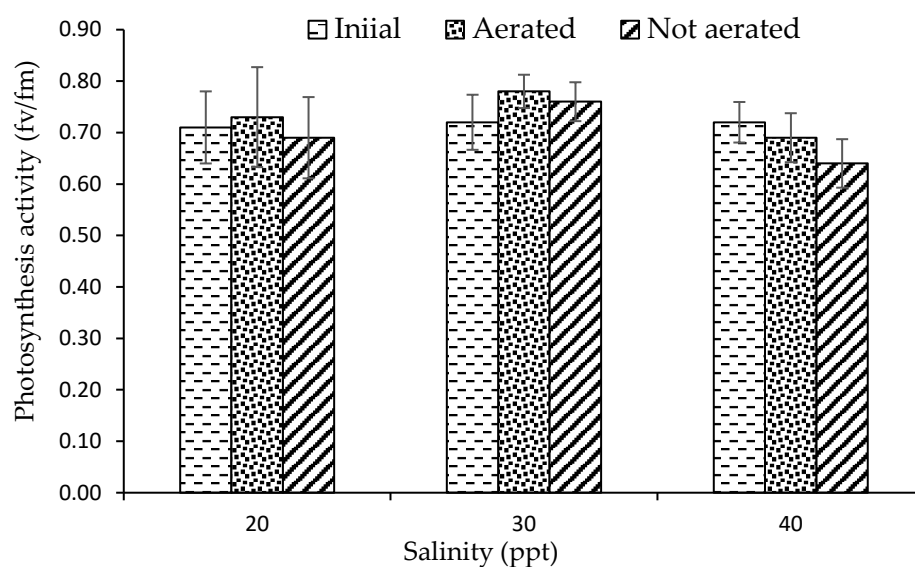

**Figure. S1** Photosynthesis efficiency (fv / fm) at three salinity levels at initial (0 h) and final (24 h) nutrient uptake with and without aeration, with 30 g/L *Caulerpa lentillifera* density. The error bars indicate standard deviation. n=3
